# Supplementary material for: Dialdehyde xylan-based sustainable, stable, and catalytic liquid metal nano-inks
Source: Royal Society of Chemistry journal article supplement (doi:10.1039/d1gc02696h), 2021-01-01
Supplement: d1gc02696h1.pdf [file d1gc02696h1.pdf]

## 1. TGA data and reaction condition variations

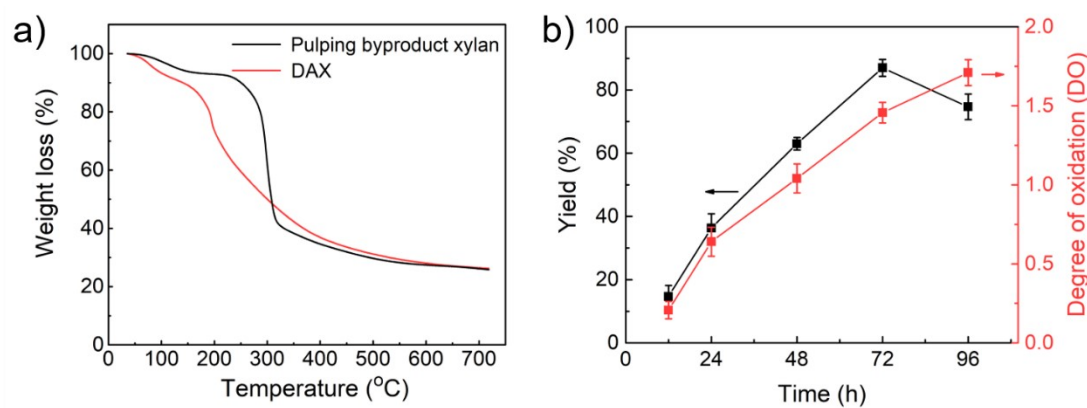

**Figure S1.** a) TGA spectra of industrial hemicellulose xylan and DAX, respectively. b) Yield and degree of oxidation of the DAX as a function of time at room temperature.

## 2. TEM data

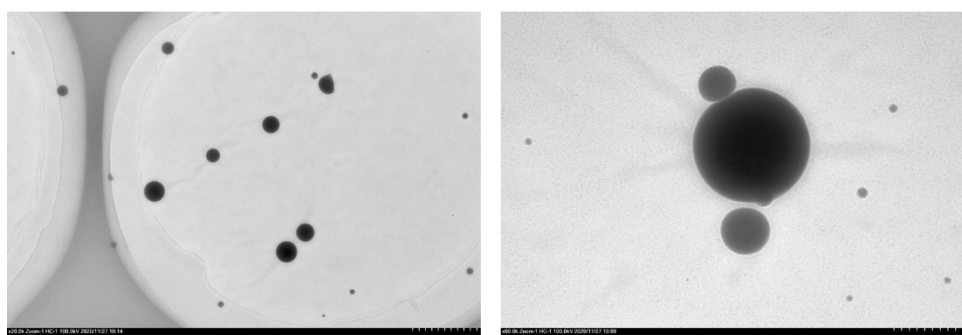

**Figure S2.** TEM images of DAX/LM nano inks, DAX concentration was set as 0.1 wt%.

## 3. Zeta potential study

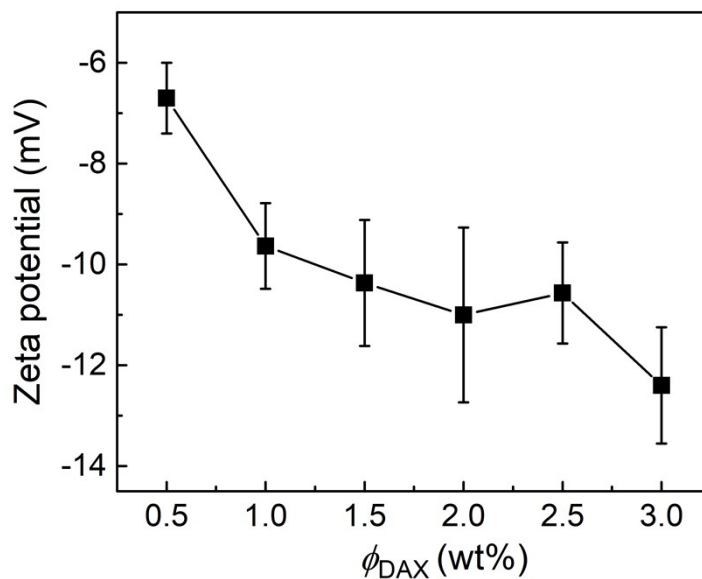

**Figure S3.** Zeta potential of the DAX/LM nano inks as a function of DAX concentration.

#### 4. SEM images of LM inks

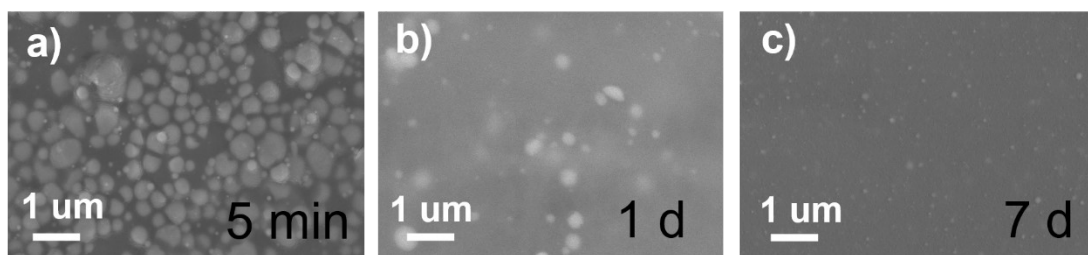

**Figure S4.** SEM images of the LM nano inks without DAX as a function of time.

#### 5. Stability study

**Table S1** Colloidal stability of other stabilizers for LM nano-inks evaluated with storing time.

| Stabilizer   | Xylan<br>(branched) | CNF  | TA   | PDA  | PVA  | PAM  |
|--------------|---------------------|------|------|------|------|------|
| Storing time | 6 h                 | ~1 d | ~1 d | ~2 d | ~2 d | ~1 d |

## 6. CV study

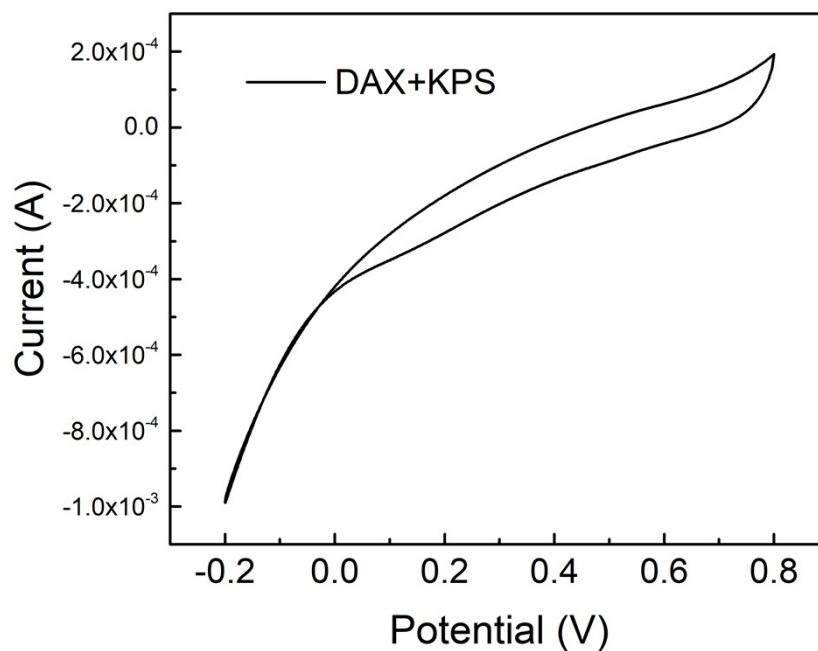

**Figure S5.** CV data for control experiment. DAX was coated on foil and used as the working electrode, Ag/AgCl (saturated Cl) as the reference electrode, Pt as the counter electrode, and the KPS solution ( $6 \text{ mg mL}^{-1}$ ) were used as the electrolyte.

## 7. Radical quench experiments

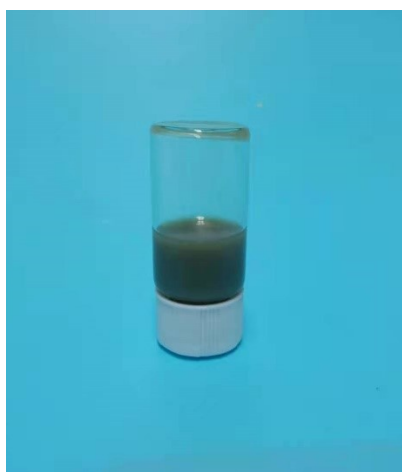

**Figure S6.** Free radical quenching experiments. NO gelation can be observed after KI added (0.1 g).

## 8. SEM data

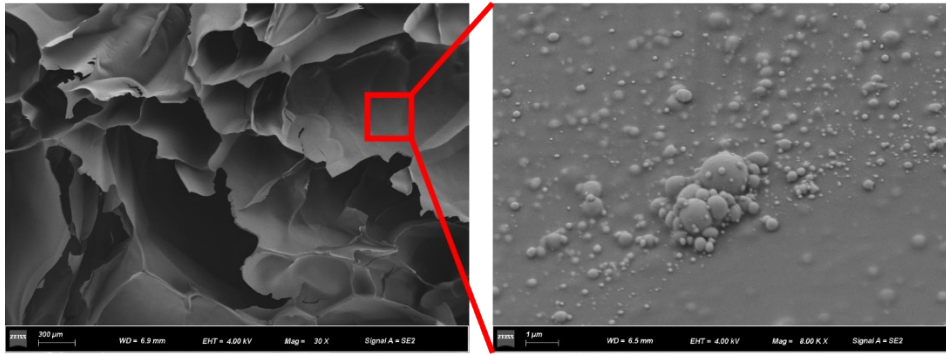

Figure S7. SEM data for DAX/CS gel.
